# Supplementary material
Source: Springer Nature journal article supplement (https://www.springermedizin.de/resource/supplementary/12885_2004_128_MOESM1_ESM.pdf/9468960)

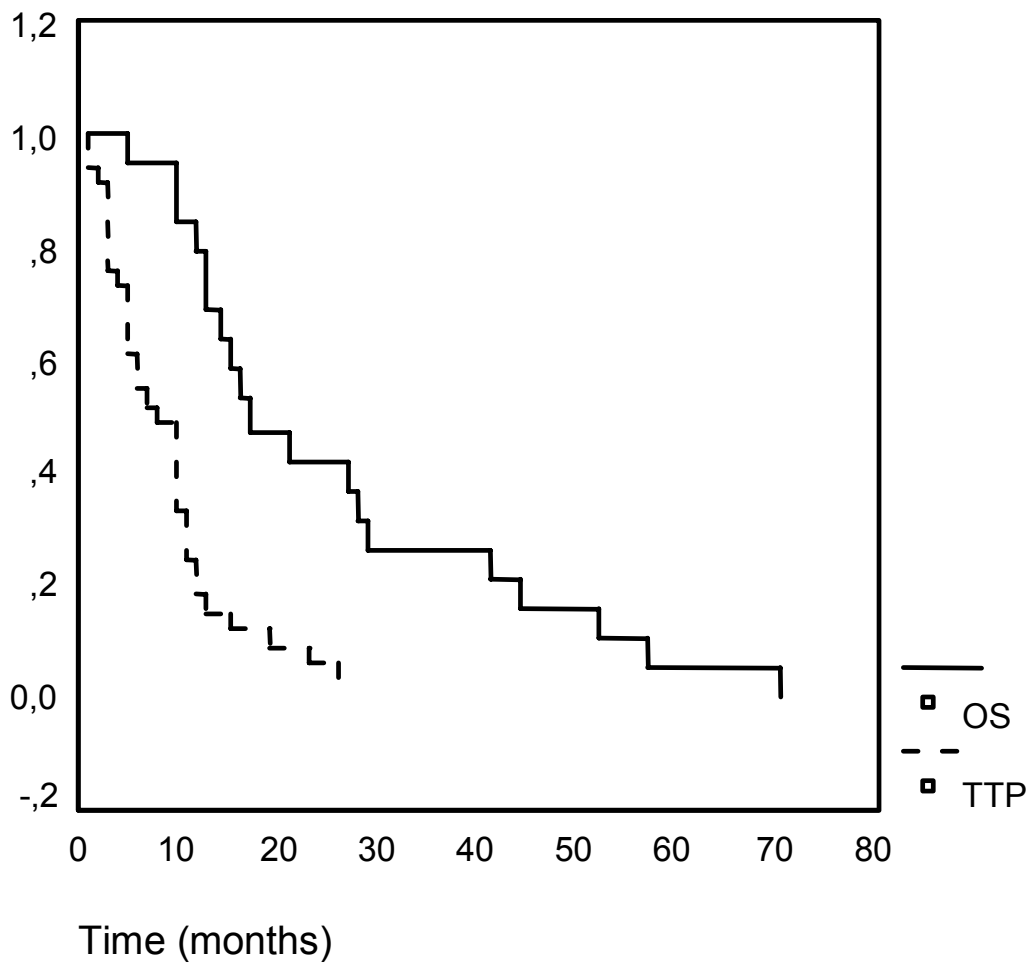

Supplement: MOESM1 [file 9468960]
